# Supplementary material for: Anti-Myocardial Ischemia Reperfusion Injury Mechanism of Dried Ginger-Aconite Decoction Based on Network Pharmacology
Source: PubMed Central journal article supplement (PMC8135102; doi:10.3389/fphar.2021.609702), 2021-05-06
Supplement: Image1.pdf [file Image1.pdf]

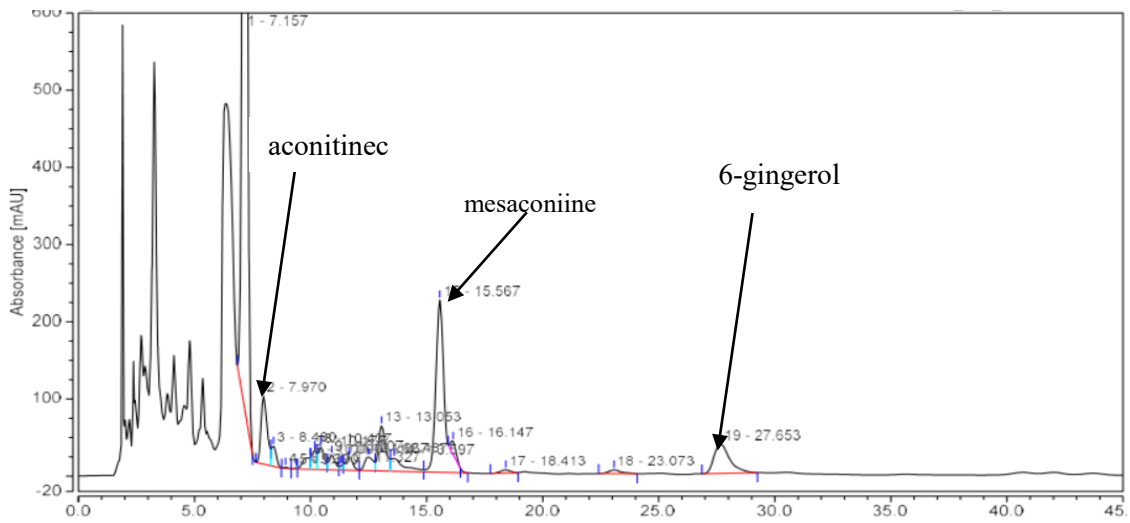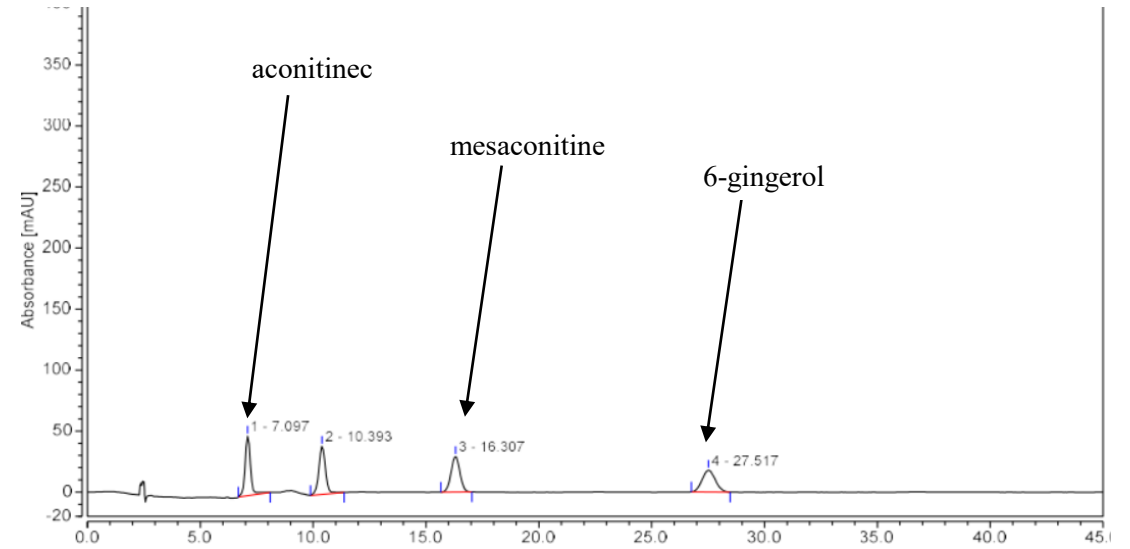

Supplement figure 1 The typical chromatograms of standard compounds. A chromatogram of DAD, B chromatogram of standard.
